# Supplementary material for: Evidence of RedOX Imbalance during Zika Virus Infection Promoting the Formation of Disulfide-Bond-Dependent Oligomers of the Envelope Protein
Source: MDPI journal article supplement (doi:10.3390/v14061131), 2022-05-24
Supplement: s1 [file s1]

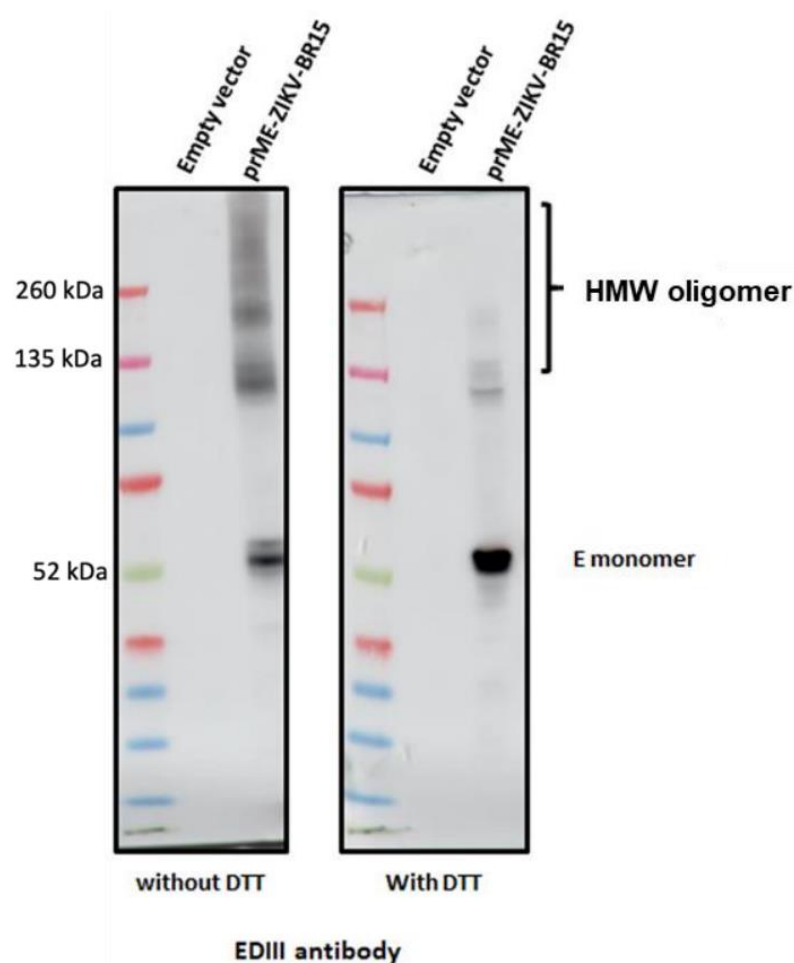

**Figure S1. ZIKV prM/E overexpression results in the formation of disulfide-crosslinked oligomers.** HEK-293T cells were transfected with a plasmid encoding ZIKV prM/E protein. After 24h, protein extracts were harvested and either treated or not with DTT before SDS-PAGE. Western blot assay was achieved with a rabbit anti-EDIII antibody. These images are representative of three independent experiments.
